# Supplementary material for: Abnormal Large-Scale Network Activation Present in Bipolar Mania and Bipolar Depression Under Resting State
Source: Front Psychiatry. 2021 Mar 26;12:634299. doi: 10.3389/fpsyt.2021.634299 (PMC8032940; doi:10.3389/fpsyt.2021.634299)
Supplement: Supplementary file 2 [file Table_2.XLSX]

## Sheet: Sheet2
	medication for bipolar mania and depression patients
	Patients Groups	CPZ Equivance		Lithium		Antidepressants		Anticonvulsants		Benzodiazepines
		mg	months	mg	months	mg	months	mg	months	mg	months
	BDD group
	1	533.33	34	1000	34	50	1.3	-	-	-	-
	2	-	-	-	-	100	0.5	-	-	15	0.5
	3	-	-	-	-	10	17	-	-	15	17
	4	-	-	-	-	-	-	-	-	-	-
	5	50	0.2	500	0.2	-	-	-	-	-	-
	6	-	-	-	-	20	0.1	-	-	0.4	0.1
	7	-	-	-	-	-	-	-	-	-	-
	8	-	-	-	-	-	-	-	-	-	-
	9	-	-	250	13	-	-	-	-	-	-
	10	267	13	150	13	-	-	-	-	0.4	1
	11	267	17	-	-	-	-	800	17	-	-
	12	-	-	-	-	75	0.2	-	-	1	1.3
	13	-	-	-	-	-	-	-	-	-	-
	14	-	-	-	-	100	5.5	500	5.5	-	-
	15	-	-	-	-	-	-	-	-	-	-
	16	-	-	-	-	20	9	750	0.1	-	-
	17	-	-	-	-	15	0.2	-	-	-	-
	18	200	0.1	-	-	75	0.1	-	-	-	-
	19	133	0.1	-	-			250	0.2	-	-
	20	100	13	-	-	100	13			-	-
	21	200	2.5	-	-	50	1.5	1000	2.6	-	-
	22	67	0.1	-	-	-	-	-	-	30	88
	23	-	-	-	-	75	0.1	-	-	-	-
	24	67	3	500	9	-	-	-	-	-	-
	25	133	0.2	-	-	60	0.2	-	-	3	39
	26	200	10	-	-	-	-	-	-	-	-
	27	133	5.5	750	5	87.5	2	-	-	-	-
	28	266	0.4	-	-	50	0.4	-	-	-	-
	29	300	0.5	750	0.5	-	-	-	-	-	-
	30	-	-	250	2	-	-	500	2	-	-
	31	-	-	-	-	75	1	-	-	-	-
	32	33	0.1	-	-	-	-	-	-	-	-
	33	-	-	-	-	75	1	-	-	-	-
	34	50	36	-	-	-	-	-	-	-	-
	35	33	0.2	-	-	50	0.2	-	-	-	-
	36	-	-	-	-	-	-	-	-	-	-
	37	50	1.5	500	2	-	-	-	-	-	-
	38	33	0.1	-	-	25	0.1	-	-	-	-
	39	-	-	-	-	-	-	-	-	-	-
	40	50	1.5	-	-	20	1.5	-	-	-	-
	41	33	2	-	-	100	2	-	-	-	-
	BDM group
	42	250	36	750	2	-	-	-	-	-	-
	43	133	0.5	500	0.5	-	-	-	-	-	-
	44	-	-	-	-	-	-	500	4	-	-
	45	266.7	12.5	500	12.5	-	-	-	-	-	-
	46	266.7	81.3	750	81.3	-	-	-	-	-	-
	47	-	-	-	-	-	-	-	-	-	-
	48	150	2	750	5.5	-	-	-	-	-	-
	49	100	1			-	-	-	-	-	-
	50	400	3	250	0.2	-	-	-	-	-	-
	51	100	1	500	1	-	-	500	1	-	-
	52	200	1	250	1	-	-	400	0.5	-	-
	53	200	0.1			-	-	400	0.1	-	-
	54	400	0.7	500	0.7	-	-	1000	0.7	-	-
	55	-	-	-	-	-	-	-	-	-	-
	56	300	0.1	250	0.5	-	-	-	-	-	-
	57	200	0.1	250	0.1	-	-	500	0.1	-	-
	58	100	2	250	2	-	-	500	2	-	-
	59	-	-	-	-	-	-	-	-	-	-
	60	-	-	-	-	-	-	-	-	-	-
	61	50	14	500	300	-	-	250	14	-	-

## Sheet: Sheet3
1.47107	1.47107		1.29073		1.1694	1.1694		1.39538		1.1694	1.1694		1.39538
1.7895	1.7895		1.88931		0.943406	0.943406		1.27324		0.943406	0.943406		1.27324
0.957176	0.957176		1.54701		0.571123	0.571123		0.984656		0.571123	0.571123		0.984656
1.65372	1.65372		1.72295		0.985409	0.985409		1.16184		0.985409	0.985409		1.16184
1.20988	1.20988		1.00363		1.20588	1.20588		1.41491		1.20588	1.20588		1.41491
1.25252	1.25252		1.76136		0.859641	0.859641		0.941431		0.859641	0.859641		0.941431
1.74543	1.74543		1.07248		1.07857	1.07857		0.833019		1.07857	1.07857		0.833019
1.60587	1.60587		1.20326		0.958873	0.958873		0.954981		0.958873	0.958873		0.954981
1.82411	1.82411		1.35938		1.09421	1.09421		1.02379		1.09421	1.09421		1.02379
1.14013	1.14013		1.46335		1.53878	1.53878		1.51666		1.53878	1.53878		1.51666
1.95248	1.95248		1.81434		1.27378	1.27378		0.876747		1.27378	1.27378		0.876747
1.91697	1.91697		1.57322		1.62348	1.62348		1.62719		1.62348	1.62348		1.62719
1.67867	1.67867		1.49248		1.1703	1.1703		1.46038		1.1703	1.1703		1.46038
2.08403	2.08403		1.298		0.769306	0.769306		1.19668		0.769306	0.769306		1.19668
1.67994	1.67994		1.72517		0.893719	0.893719		1.05205		0.893719	0.893719		1.05205
2.04091	2.04091		1.42462		1.08584	1.08584		0.83225		1.08584	1.08584		0.83225
1.57605	1.57605		1.41902		1.1518	1.1518		1.00687		1.1518	1.1518		1.00687
1.59591	1.59591		1.84035		1.36555	1.36555		1.02761		1.36555	1.36555		1.02761
1.37119	1.37119		1.61259		1.1068	1.1068		0.997196		1.1068	1.1068		0.997196
2.01712	2.01712		1.97486		0.965732	0.965732		0.827206		0.965732	0.965732		0.827206
2.02146	2.02146		1.86524
1.23443	1.23443		1.10558
1.74744	1.74744		1.44614
1.53628	1.53628		1.31216
1.79415	1.79415		1.84753
2.05091	2.05091		1.76253
1.77474	1.77474		1.94378
1.39019	1.39019		1.69719
2.09462	2.09462		1.73779
2.01792	2.01792		1.99612
1.16609	1.16609		1.00655
1.1996	1.1996		1.24961
1.36436	1.36436		1.27531
1.95779	1.95779		1.84081
1.62306	1.62306		1.59702
1.71492	1.71492		1.58616
1.69624	1.69624		1.65814
1.55242	1.55242		1.50627
1.9723	1.9723		1.51908
2.05106	2.05106		2.04914
1.74481	1.74481		1.9277
